# Supplementary material for: STAT5 promotes PD-L1 expression by facilitating histone lactylation to drive immunosuppression in acute myeloid leukemia
Source: Springer Nature journal article supplement (doi:10.1038/s41392-023-01605-2), 2023-09-30
Supplement: MOESM1 [file 41392_2023_1605_MOESM1_ESM.pdf]

## Supplementary Materials for

STAT5 promotes PD-L1 expression by facilitating histone lactylation to drive immunosuppression in acute myeloid leukemia

Ze-Wei Huang<sup>1</sup>, Xue-Ning Zhang<sup>1</sup>, Ling Zhang<sup>1</sup>, Ling-Ling Liu<sup>1</sup>, Jing-Wen Zhang<sup>1</sup>, Yu-Xiang Sun<sup>2</sup>, Jue-Qiong Xu<sup>1</sup>, Quentin Liu<sup>1,3,\*</sup>, Zi-Jie Long<sup>1,\*</sup>

Correspondence to: longzij@mail.sysu.edu.cn, liuq9@mail.sysu.edu.cn

### **This PDF file includes:**

Figures. S1 to S4

Tables. S1 to S2

**Figure. S1.**

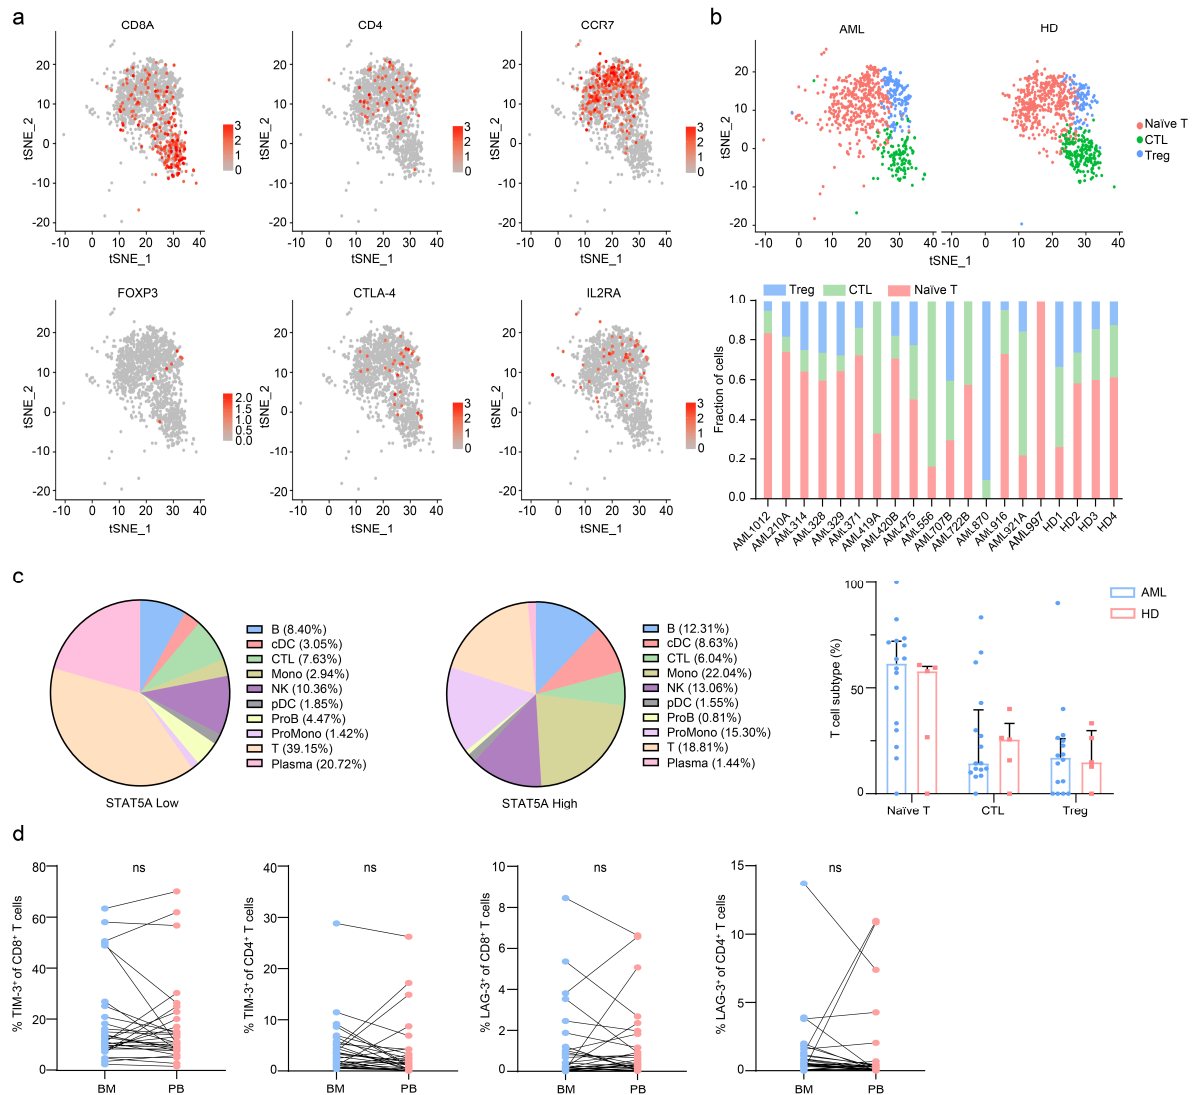

**Supplementary Fig. 1 STAT5 dysregulates the function of T cells.** **a, b** T cells from 16 AML patients and 4 healthy donors derived from GSE116256 were classified into CTL, Naïve T, and Treg based on the specific markers on cell surface. T cells were first classified by CD8A and CD4 surface markers, and CTL were defined by CD8A. Subsequently, naïve T cells were identified by CCR7 while regulatory T cells (Treg) were identified by FOXP3, CTLA-4 and IL2RA. The proportion of each type of T cells was numerically displayed and colored. **c** Cells of 16 AML patients derived from GSE116256 were divided by the expression of STAT5A gene. Pie charts showed the relative abundance of immune cells in STAT5A high- and low-expressed AML patients. **d** PBMCs and BMMCs were isolated from AML patients. The expression of TIM-3 and LAG-3 (30 BM vs. 30 PB) was determined. Data were represented as mean  $\pm$  SD. ns not significant.

**Figure. S2.**

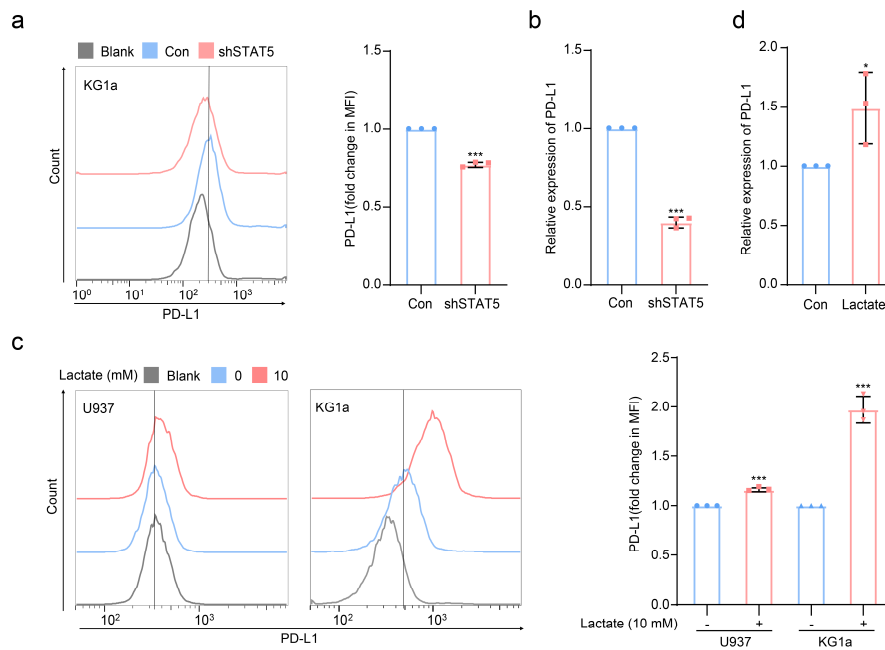

**Supplementary Fig. 2 Lactate induces PD-L1 expression in AML cells.** **a, b** Equal numbers of control and STAT5 knock-down KG1a were subjected to flow cytometry and qPCR for PD-L1 expression. **c** U937 and KG1a were exposed to lactate for 24 h respectively and subjected to flow cytometry for PD-L1 expression. **d** AML BMNCs (n=3) were treated with 10 mM lactate for 24 h, and PD-L1 expression was detected by qPCR. Data were represented as mean  $\pm$  SD. \* $p < 0.05$ , \*\*\* $p < 0.001$ .

**Figure. S3.**

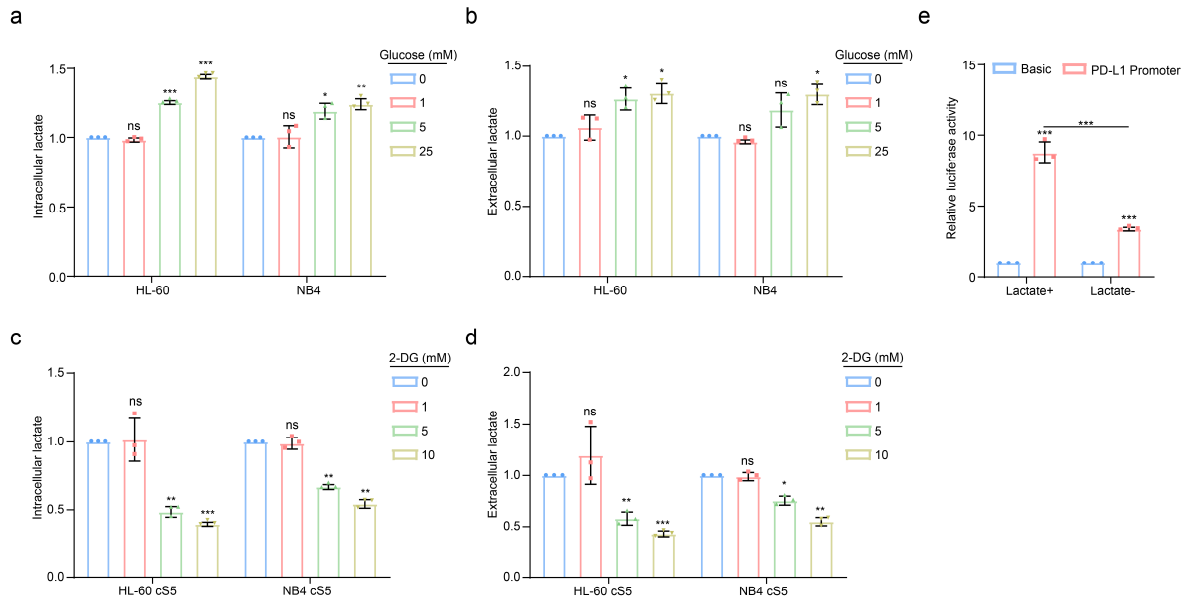

**Supplementary Fig. 3 Lactate activates PD-L1 promoter in AML cells.** **a, b** HL-60 and NB4 cells were cultured in glucose-free culture medium and exposed to glucose for 24 h respectively to determinate intracellular and extracellular lactate. **c, d** cS5 AML cells were cultured in glucose-free culture medium supplied with 25 mM glucose followed by exposure to 2-DG for 24 h to determinate intracellular and extracellular lactate. **e** 293FT cells were transiently transfected with pRL-TK, pGL3 basic or pGL3-PD-L1 promoter plasmid followed by luciferase activity determination. For lactate deprivation, the culture medium was changed every 4 h until luciferase activity determination. Data were represented as mean  $\pm$  SD. \* $p < 0.05$ , \*\* $p < 0.01$ , \*\*\* $p < 0.001$ , ns not significant.

**Figure. S4.**

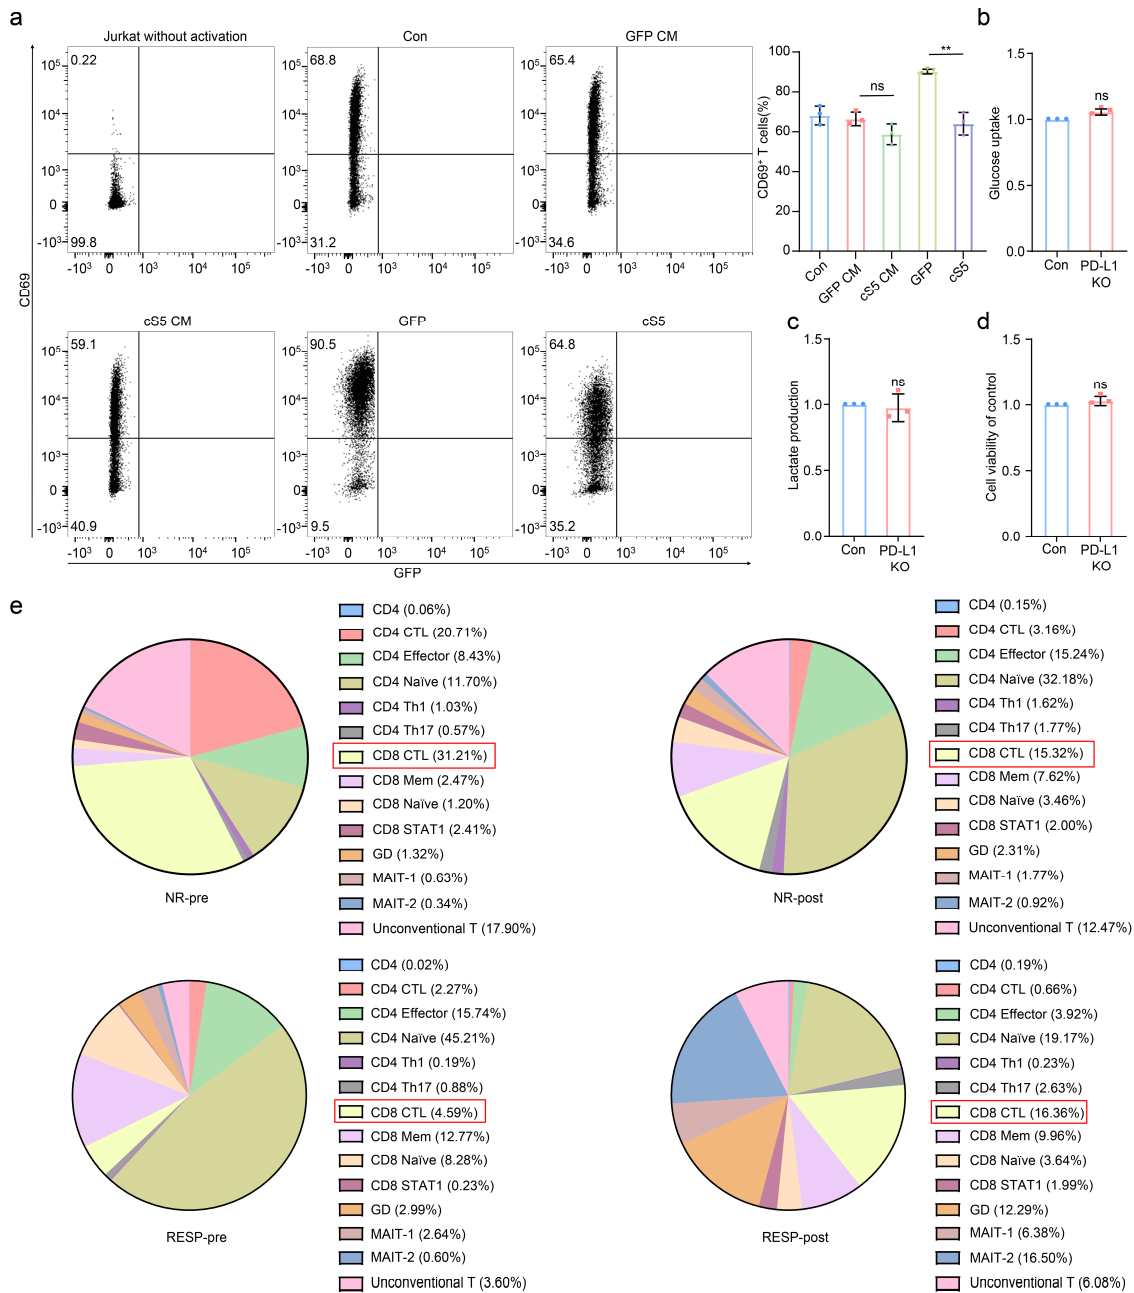

**Supplementary Fig. 4 STAT5 represses T cell activation.** a CM was collected in NB4 GFP and cS5 cells after culturing for 24 h. Jurkat cells were co-cultured in CM with or without NB4 GFP and cS5 cells in 24-well plates accompanied with 2.5  $\mu\text{g}/\text{mL}$  anti-human CD3 and 0.5  $\mu\text{g}/\text{mL}$  anti-human CD28 stimulation. Cells were then subjected to flow cytometry. **b-d** Control and PD-L1 knock-out cS5 cells were cultured for 24 h followed by glucose uptake, lactate production and cell viability detection. **e** BM cells of 6 relapsed/refractory AML patients derived from GSE198052 were divided into four groups based on the response to azacytidine+nivolumab

treatment. Pie charts showed the relative abundance of T cell subsets in non-responded (NR) and responded (RESP) AML patients pre- or post-azacytidine+nivolumab treatment. Data were represented as mean  $\pm$  SD. \*\*p < 0.01, ns not significant.

**Table S1.**

Clinical characteristics of AML patients.

| Patient No. | Age(yr)/ Gender | WBC (10 <sup>9</sup> /L) | FAB | % Blast | Karyotype                                                                |
|-------------|-----------------|--------------------------|-----|---------|--------------------------------------------------------------------------|
| 1           | 49/Female       | 84.82                    | M1  | 92.5    | -                                                                        |
| 2           | 73/Male         | 7.71                     | M2  | 70.5    | 46,XY                                                                    |
| 3           | 35/Female       | 58.61                    | M2  | 79      | 46,XX                                                                    |
| 4           | 31/Female       | 9.96                     | M2  | 79.5    | 46,XX,t(8;21)(q22;q22)                                                   |
| 5           | 30/Male         | 82.26                    | M3  | 75.5    | 46,XY,t(15;17)(q24;q21)                                                  |
| 6           | 33/Male         | 1.0                      | M3  | 73      | 46,XY                                                                    |
| 7           | 51/Male         | 23.32                    | M3  | 78      | 46,XY,t(15;17)(q24;q21)                                                  |
| 8           | 56/Male         | 14.62                    | M3  | 81      | 46,XY,t(15;17)(q24;q21)                                                  |
| 9           | 38/Male         | 41.28                    | M3  | 88      | 46,XY,t(15;17)(q24;q21)                                                  |
| 10          | 24/Male         | 7.9                      | M5  | 90.5    | -                                                                        |
| 11          | 26/Male         | 11.06                    | M5  | 70.5    | 46,XY                                                                    |
| 12          | 50/Female       | 42.61                    | M5  | 89      | 46,XX                                                                    |
| 13          | 41/Male         | 57.68                    | M5  | 86.5    | -                                                                        |
| 14          | 69/Female       | 77.1                     | M5  | 92.5    | 46,XX                                                                    |
| 15          | 53/Female       | 163.2                    | M5  | 73      | 46,XX                                                                    |
| 16          | 24/Male         | 55.79                    | M5  | 84      | 46,XY                                                                    |
| 17          | 4/Male          | 94.62                    | M5  | 88      | -                                                                        |
| 18          | 44/Male         | 61.1                     | M5  | 84.5    | 46,XY                                                                    |
| 19          | 48/Male         | 19.07                    | M5  | 71.5    | 40-42,XY,-5,i(6)(p10),-7,-8,-11,<br>add(12)(p13),-15,inc,-18,+mar1,+mar2 |
| 20          | 57/Male         | 11.05                    | M5  | 75.5    | 46,XY                                                                    |
| 21          | 38/Female       | 155                      | M5  | 92.5    | 46,XX                                                                    |
| 22          | 39/Male         | 224                      | M5  | 93.5    | 46,XY                                                                    |
| 23          | 62/Male         | 41.11                    | M5  | 80      | 46,XY                                                                    |
| 24          | 17/Female       | 9.98                     | M5  | 90      | 46,XX,t(16;21)(p11;q22)                                                  |
| 25          | 22/Female       | 21.71                    | M2  | 23.5    | 46,XX,t(8;21)(q22;q22)                                                   |
| 26          | 49/Male         | 40.18                    | M2  | 34.5    | 46,XY                                                                    |

27      66/Male      0.74      M5      71      46,XY

---

FAB, French-American-British classification; % Blast, Percentage of leukemic blasts on bone marrow smear; -, Uncategorized.

**Table S2.**

Primer sequence used for qPCR and plasmid construction.

| Gene                                             | Sequence                                             |
|--------------------------------------------------|------------------------------------------------------|
| HPRT-Forward (qPCR)                              | 5'-GCGTCGTGATTAGTGATGATGA-3'                         |
| HPRT-Reverse (qPCR)                              | 5'-GCACACAGAGGGCTACAATG-3'                           |
| Human STAT5A-Forward (qPCR)                      | 5'-GCAGAGTCCGTGACAGAGG-3'                            |
| Human STAT5A-Reverse (qPCR)                      | 5'-CCACAGGTAGGGACAGAGTCT-3'                          |
| Mouse STAT5A-Forward (qPCR)                      | 5'-GCAGAAGAAGGCGGAGCA-3'                             |
| Mouse STAT5A-Reverse (qPCR)                      | 5'-GGACATGGCGTCAACC-3'                               |
| CD274-Forward (qPCR)                             | 5'-TGGCATTGCTGAACGCATTT-3'                           |
| CD274-Reverse (qPCR)                             | 5'-TGCAGCCAGGTCTAATTGTTTT-3'                         |
| PDHA-Forward (qPCR)                              | 5'-ATGGAATGGGAACGTCTGTTG-3'                          |
| PDHA-Reverse (qPCR)                              | 5'-CCTCTCGGACGCACAGGATA-3'                           |
| PFKP-Forward (qPCR)                              | 5'-GCATGGGTATCTACGTGGGG-3'                           |
| PFKP-Reverse (qPCR)                              | 5'-CTCTGCGATGTTTGAGCCTC-3'                           |
| HK1-Forward (qPCR)                               | 5'-GCTCTCCGATGAACTCTCATAG-3'                         |
| HK1-Reverse (qPCR)                               | 5'-GGACCTTACGAATGTTGGCAA-3'                          |
| CD274 promoter-Forward (qPCR)                    | 5'-CAGATGTTGGCTTGTTGTAA-3'                           |
| CD274 promoter-Reverse (qPCR)                    | 5'-GTATCTAGTGTTGGTGTCCCTA-3'                         |
| CD274 promoter-Forward<br>(Plasmid construction) | 5'-ATAGGTACCGAGCTCATCTGTTTTGCTTT<br>ACATATTTTTCTG-3' |
| CD274 promoter-Reverse<br>(Plasmid construction) | 5'-GCACGCGTAAGAGCTCTGCCCCCTAGA<br>CCA-3'             |
| PDHA promoter-Forward<br>(Plasmid construction)  | 5'-ATAGGTACCGAGCTTTTCTATTTTCAT<br>CATTCCTTC-3'       |
| PDHA promoter-Reverse<br>(Plasmid construction)  | 5'-GCACGCGTAAGAGCTGCTTCTGAGAA<br>GCGC-3'             |
| PFKP promoter-Forward<br>(Plasmid construction)  | 5'-ATAGGTACCGAGCTAATTGCATAAGG<br>AGATAAGGGGC-3'      |
| PFKP promoter-Reverse<br>(Plasmid construction)  | 5'-GCACGCGTAAGAGCTCCGTCCGTCCCT<br>CCC-3'             |

HK1 promoter-Forward

(Plasmid construction)

5'-ATAGGTACCGAGCTGAGTTTCACATCT

GGCCAGA-3'

HK1 promoter-Reverse

(Plasmid construction)

5'-GCACGCGTAAGAGCTGTTCGAGAGCA

GCCTGG-3'

---
